# Supplementary material for: Impact of mineral components in cow manure biochars on the adsorption and competitive adsorption of oxytetracycline and carbaryl
Source: Royal Society of Chemistry journal article supplement (doi:10.1039/c6ra26534k), 2017-01-01
Supplement: c6ra26534k1.pdf [file c6ra26534k1.pdf]

## Supplementary Information

### Impact of mineral components in cow manure biochars on the adsorption and competitive adsorption of oxytetracycline and carbaryl

Mengwei Li<sup>a</sup>, Zhendong Zhao<sup>a</sup>, Xiaodan Wu<sup>c</sup>, Wenjun Zhou<sup>a,b,\*</sup>, Lizhong Zhu<sup>a, b</sup>

<sup>a</sup>Department of Environmental Science, Zhejiang University, Hangzhou, Zhejiang 310058, China

<sup>b</sup>Zhejiang Provincial Key Laboratory of Organic Pollution Process and Control, Hangzhou, Zhejiang 310058, China

<sup>c</sup>Center of Analysis and Measurement, Zhejiang University, Hangzhou 310058, China

\* **Corresponding author:** Tel: +86-571-88982591; Fax: +86-571-88982591; E-mail address: wenjunzhou@zju.edu.cn

Supplementary Information Summary:

- Number of tables: 2
- Number of figures: 3

**Table S1**

Surface elemental composition and the atomic ratios determined for the original (CMBCs) and demineralized (DCMBCs) biochars.

| Sorbent  | Surface elemental composition (%) <sup>a</sup> |      |       |      |      |      |      |      |      | Atomic ratio |         |
|----------|------------------------------------------------|------|-------|------|------|------|------|------|------|--------------|---------|
|          | C                                              | N    | O     | Si   | Fe   | Al   | P    | S    | Ca   | O/C          | (O+N)/C |
| CMBC300  | 64.03                                          | 3.69 | 25.27 | 3.31 | 0.27 | 1.42 | 0.6  | 0.26 | 1.15 | 0.30         | 0.35    |
| CMBC400  | 58.58                                          | 3.02 | 27.87 | 4.33 | 0.33 | 2.92 | 1.36 | 0.36 | 1.24 | 0.36         | 0.40    |
| CMBC500  | 51.11                                          | 4.58 | 31.44 | 5.78 | —    | 3.95 | 1.01 | —    | 1.76 | 0.47         | 0.55    |
| CMBC600  | 54.93                                          | 3.18 | 30.27 | 5.47 | —    | 2.64 | 1.36 | —    | 1.87 | 0.41         | 0.46    |
| CMBC700  | 57.49                                          | 1.78 | 27.67 | 5.73 | —    | 2.99 | 0.78 | 0.48 | 1.97 | 0.36         | 0.39    |
| DCMBC600 | 66.07                                          | 3.38 | 24.57 | 4.51 | 0.13 | 1.05 | 0.3  | —    | —    | 0.28         | 0.32    |
| DCMBC700 | 67.92                                          | 2.73 | 23.31 | 4.57 | —    | 0.56 | 0.61 | —    | —    | 0.26         | 0.29    |

<sup>a</sup> Determined by X-ray photoelectron spectroscopy (XPS).

**Table S2**

Freundlich model parameters and concentration-dependent distribution coefficients ( $K_{oc}$ ) for oxytetracycline (OTC) and carbaryl (CBL) sorption isotherms on original (CMBCs) and demineralized (DCMBCs) biochars.

| Sorbent  | OTC       |       |       |                   |            |            | CBL       |       |       |                   |            |            |
|----------|-----------|-------|-------|-------------------|------------|------------|-----------|-------|-------|-------------------|------------|------------|
|          | log $K_f$ | $n$   | $R^2$ | log $K_{oc}^a$ at |            |            | log $K_f$ | $n$   | $R^2$ | log $K_{oc}^a$ at |            |            |
|          |           |       |       | $C_{e1}^b$        | $C_{e2}^b$ | $C_{e3}^b$ |           |       |       | $C_{e1}^b$        | $C_{e2}^b$ | $C_{e3}^b$ |
| CMBC300  | 3.05      | 0.247 | 0.984 | 3.975             | 3.222      | 2.469      | 3.32      | 0.762 | 0.997 | 3.81              | 3.572      | 3.334      |
| CMBC400  | 3.09      | 0.357 | 0.981 | 3.994             | 3.351      | 2.708      | 3.47      | 0.692 | 0.993 | 4.043             | 3.735      | 3.427      |
| CMBC500  | 3.23      | 0.377 | 0.980 | 4.090             | 3.467      | 2.844      | 3.85      | 0.479 | 0.968 | 4.475             | 3.954      | 3.433      |
| CMBC600  | 3.59      | 0.323 | 0.969 | 4.499             | 3.822      | 3.145      | 4.11      | 0.382 | 0.973 | 4.783             | 4.165      | 3.547      |
| CMBC700  | 3.77      | 0.395 | 0.978 | 4.646             | 4.041      | 3.436      | 4.43      | 0.282 | 0.887 | 5.159             | 4.441      | 3.723      |
| DCMBC600 | 4.15      | 0.171 | 0.989 | 5.038             | 4.209      | 3.380      | 4.02      | 0.213 | 0.997 | 4.630             | 3.843      | 3.056      |
| DCMBC700 | 4.42      | 0.164 | 0.983 | 5.309             | 4.473      | 3.637      | 4.37      | 0.162 | 0.989 | 4.997             | 4.159      | 3.321      |

<sup>a</sup>  $K_{oc}$  represents the concentration-dependent carbon-normalized sorption distribution coefficient ( $K_{oc} = K_F C_e^{n-1}/f_{oc}$ ), in units of L/kg of organic carbon, where  $f_{oc}$  is the percentage of carbon content of biochar.

<sup>b</sup>For OTC,  $C_{e1}$ ,  $C_{e2}$ , and  $C_{e3}$  were 0.2, 2.0, and 20 mg/L, respectively; for CBL,  $C_{e1}$ ,  $C_{e2}$ , and  $C_{e3}$  equaled to  $0.005 S_w$ ,  $0.05 S_w$ , and  $0.5 S_w$ , respectively.  $S_w$  (mg/L) is the solubility of carbaryl in water under neutral pH.

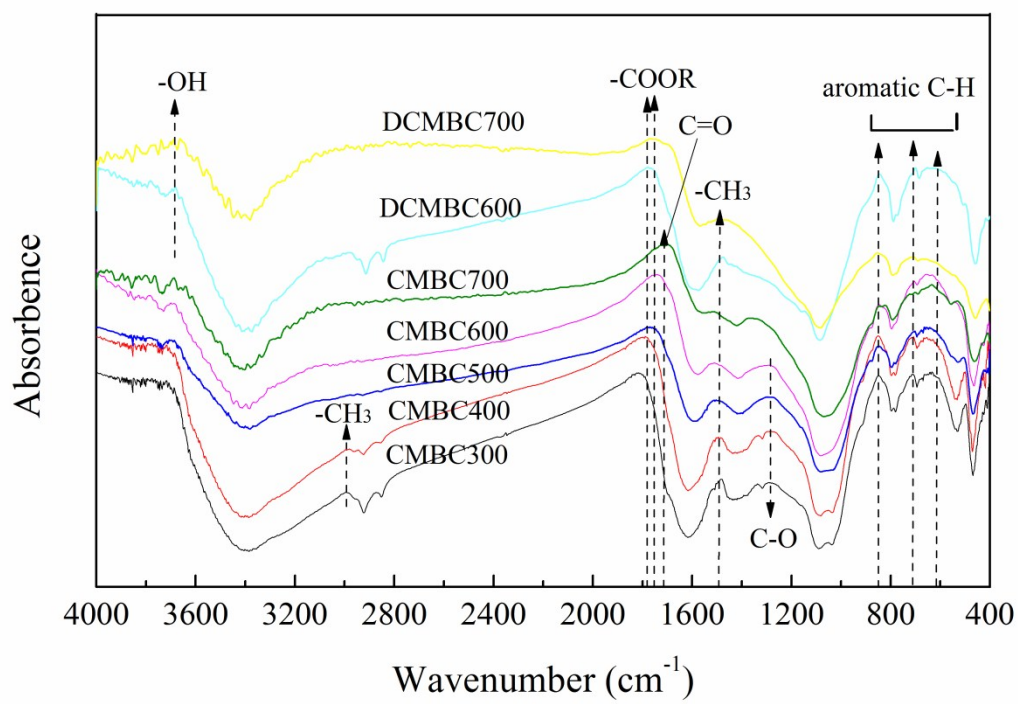

**Fig. S1.** FTIR spectra of the original (CMBCs) and demineralized (DCMBCs) biochars.

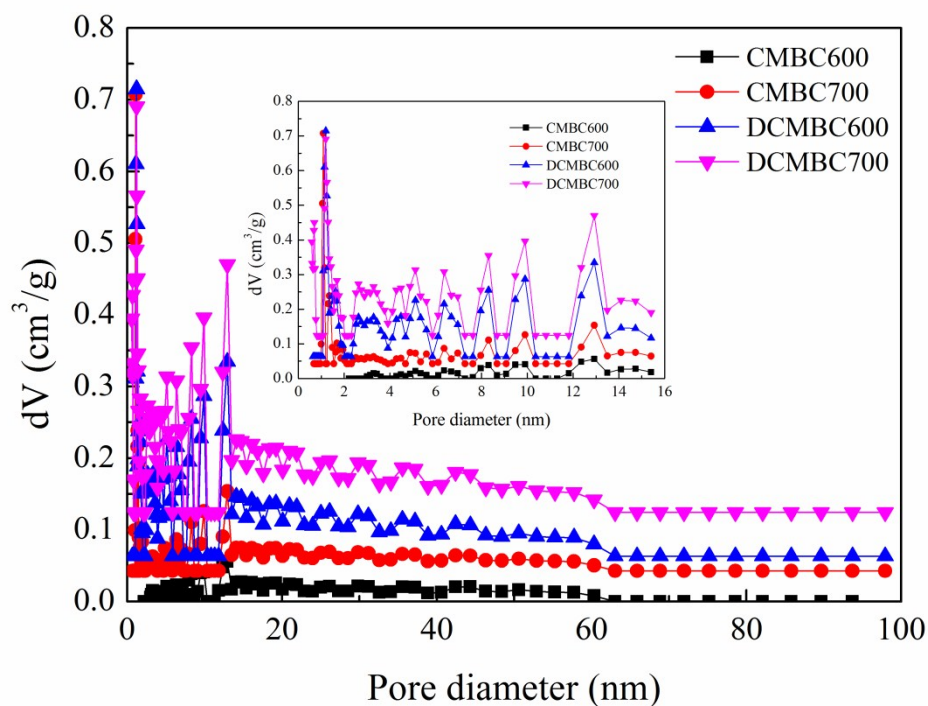

**Fig. S2.** Pore size distribution determined for selected original biochars (CMBC600 and CMBC700) and the corresponding demineralized ones (DCMBC600 and DCMBC700).

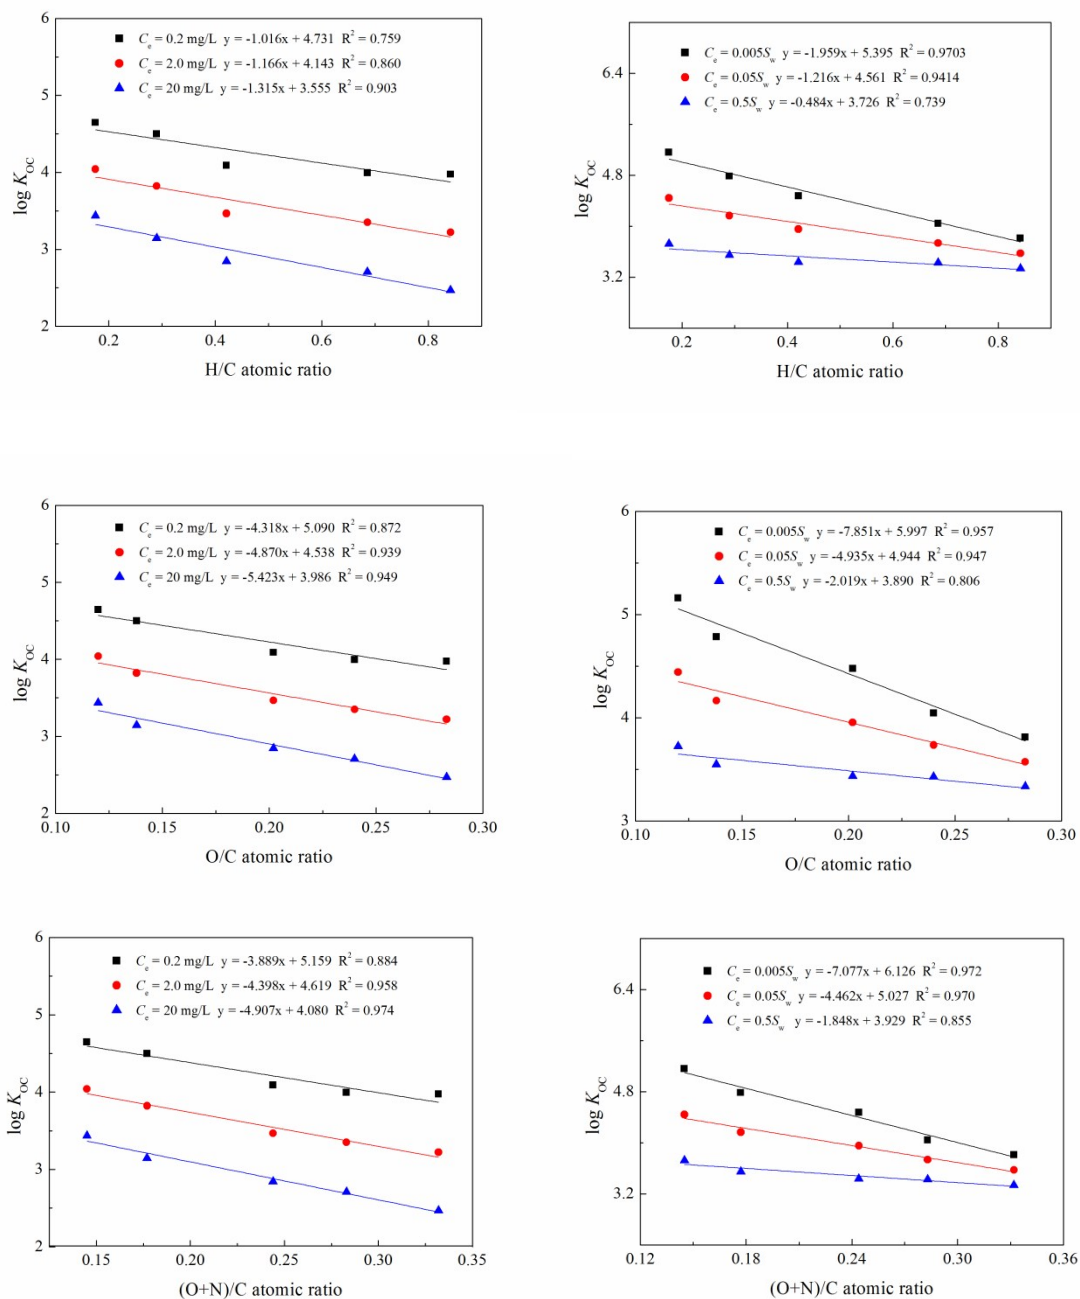

**Fig. S3.** Relationship between different atomic ratios of biochars and the Freundlich model sorption affinity index ( $\log K_{oc}$  values at three different concentrations of sorbate)

determined for oxytetracycline (OTC) and carbaryl (CBL) on original biochars.

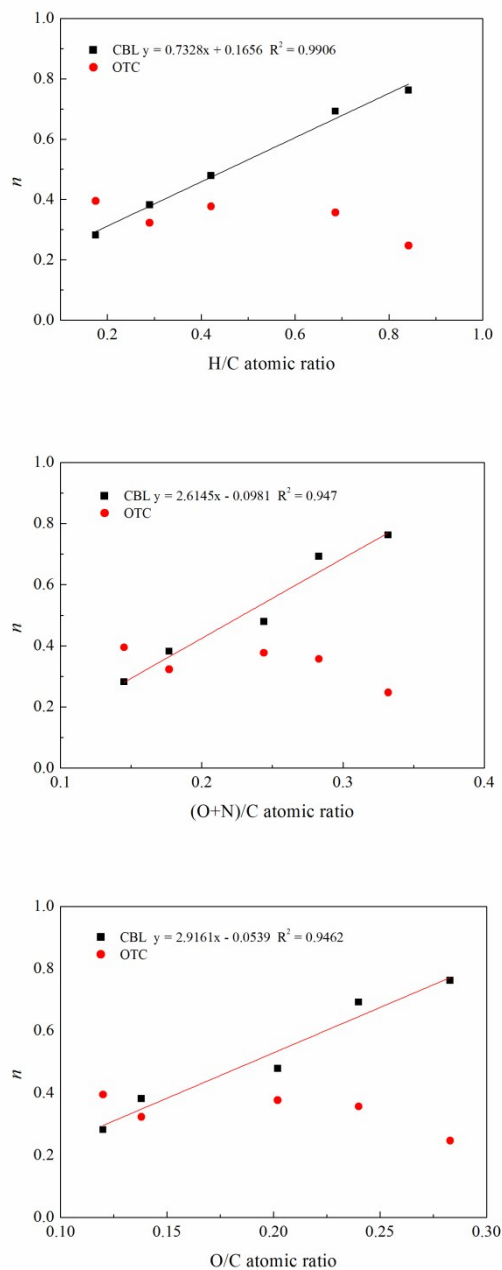

**Fig. S4.** Relationship between the different atomic ratios of biochars and the Freundlich model nonlinearity index ( $n$ ) determined for oxytetracycline (OTC) and carbaryl (CBL) on original biochars.
